# Supplementary material for: Immunomodulatory effects of supercritical CO 2 extracted oils from Portulaca oleracea and Perilla frutescens (PPCE) in healthy individuals: a randomized double-blind clinical trial
Source: Royal Society of Chemistry journal article supplement (doi:10.1039/d4fo03361b), 2024-10-23
Supplement: d4fo03361b1.pdf [file d4fo03361b1.pdf]

## Supplemental information

**Supplementary Table 1.** URI incidence rate of the study subject during the 8weeks intervention period.

| Symptoms         |                | Test group (n=28) |             |                               | Placebo group (n=28) |             |                               | <i>p</i> -value <sup>2)</sup> |
|------------------|----------------|-------------------|-------------|-------------------------------|----------------------|-------------|-------------------------------|-------------------------------|
|                  |                | Baseline          | 8-week      | <i>p</i> -value <sup>1)</sup> | Baseline             | 8-week      | <i>p</i> -value <sup>1)</sup> |                               |
| Sore throat      | Score          | 0.00 ± 0.00       | 0.25 ± 0.50 | 1.000                         | 1.00 ± 1.41          | 0.40 ± 0.55 | 1.000                         | 1.000                         |
|                  | Duration (day) | 0.00 ± 0.00       | 0.50 ± 1.00 | 1.000                         | 0.50 ± 0.71          | 1.20 ± 1.64 | 0.500                         | 0.971                         |
| Rhinorrhea       | Score          | 0.33 ± 0.58       | 0.50 ± 0.58 | 1.000                         | 0.00 ± 0.00          | 0.40 ± 0.89 | 1.000                         | 1.000                         |
|                  | Duration (day) | 0.33 ± 0.58       | 1.75 ± 2.06 | 0.500                         | 0.00 ± 0.00          | 0.80 ± 1.79 | 1.000                         | 1.000                         |
| Nasal congestion | Score          | 0.00 ± 0.00       | 0.25 ± 0.50 | 1.000                         | 0.00 ± 0.00          | 0.00 ± 0.00 |                               | 0.335                         |
|                  | Duration (day) | 0.00 ± 0.00       | 0.25 ± 0.50 | 1.000                         | 0.00 ± 0.00          | 0.00 ± 0.00 |                               | 0.335                         |
| Sneezing         | Score          | 0.33 ± 0.58       | 0.25 ± 0.50 | 1.000                         | 0.00 ± 0.00          | 0.40 ± 0.55 | 0.500                         | 0.331                         |
|                  | Duration (day) | 0.33 ± 0.58       | 1.00 ± 2.00 | 1.000                         | 0.00 ± 0.00          | 1.20 ± 2.17 | 0.500                         | 0.331                         |
| Hoarseness       | Score          | 0.33 ± 0.58       | 0.25 ± 0.50 | 1.000                         | 0.00 ± 0.00          | 0.40 ± 0.89 | 1.000                         | 0.571                         |
|                  | Duration (day) | 0.67 ± 1.15       | 0.25 ± 0.50 | 1.000                         | 0.00 ± 0.00          | 1.40 ± 3.13 | 1.000                         | 0.571                         |
| Myalgia          | Score          | 0.00 ± 0.00       | 0.00 ± 0.00 | -                             | 0.00 ± 0.00          | 0.40 ± 0.89 | 1.000                         | 0.335                         |
|                  | Duration (day) | 0.00 ± 0.00       | 0.00 ± 0.00 | -                             | 0.00 ± 0.00          | 1.00 ± 2.24 | 1.000                         | 0.335                         |
| Earaches         | Score          | 0.00 ± 0.00       | 0.00 ± 0.00 | -                             | 0.00 ± 0.00          | 0.00 ± 0.00 | -                             | -                             |
|                  | Duration (day) | 0.00 ± 0.00       | 0.00 ± 0.00 | -                             | 0.00 ± 0.00          | 0.00 ± 0.00 | -                             | -                             |

|          |                |             |             |       |             |             |       |       |
|----------|----------------|-------------|-------------|-------|-------------|-------------|-------|-------|
| Fever    | Score          | 0.00 ± 0.00 | 0.00 ± 0.00 | -     | 0.00 ± 0.00 | 0.00 ± 0.00 | -     | -     |
|          | Duration (day) | 0.00 ± 0.00 | 0.00 ± 0.00 | -     | 0.00 ± 0.00 | 0.00 ± 0.00 | -     | -     |
| Headache | Score          | 0.67 ± 1.15 | 0.00 ± 0.00 | 1.000 | 0.00 ± 0.00 | 0.20 ± 0.45 | 1.000 | 0.169 |
|          | Duration (day) | 0.33 ± 0.58 | 0.00 ± 0.00 | 1.000 | 0.00 ± 0.00 | 0.20 ± 0.45 | 1.000 | 0.169 |
| Cough    | Score          | 0.00 ± 0.00 | 0.50 ± 0.58 | 0.500 | 0.50 ± 0.71 | 0.20 ± 0.45 | 1.000 | 0.331 |
|          | Duration (day) | 0.00 ± 0.00 | 1.25 ± 1.50 | 0.500 | 1.00 ± 1.41 | 0.40 ± 0.89 | 1.000 | 0.322 |
| Sputum   | Score          | 0.67 ± 1.15 | 0.00 ± 0.00 | 1.000 | 0.00 ± 0.00 | 0.20 ± 0.45 | 1.000 | 0.169 |
|          | Duration (day) | 1.00 ± 1.73 | 0.00 ± 0.00 | 1.000 | 0.00 ± 0.00 | 0.60 ± 1.34 | 1.000 | 0.169 |
| Dyspnea  | Score          | 0.00 ± 0.00 | 0.00 ± 0.00 | -     | 0.00 ± 0.00 | 0.00 ± 0.00 | -     | -     |
|          | Duration (day) | 0.00 ± 0.00 | 0.00 ± 0.00 | -     | 0.00 ± 0.00 | 0.00 ± 0.00 | -     | -     |
| Diarrhea | Score          | 0.00 ± 0.00 | 0.00 ± 0.00 | -     | 0.00 ± 0.00 | 0.00 ± 0.00 | -     | -     |
|          | Duration (day) | 0.00 ± 0.00 | 0.00 ± 0.00 | -     | 0.00 ± 0.00 | 0.00 ± 0.00 | -     | -     |
| Nausea   | Score          | 0.00 ± 0.00 | 0.00 ± 0.00 | -     | 0.00 ± 0.00 | 0.00 ± 0.00 | -     | -     |
|          | Duration (day) | 0.00 ± 0.00 | 0.00 ± 0.00 | -     | 0.00 ± 0.00 | 0.00 ± 0.00 | -     | -     |
| Vomiting | Score          | 0.00 ± 0.00 | 0.00 ± 0.00 | -     | 0.00 ± 0.00 | 0.00 ± 0.00 | -     | -     |
|          | Duration (day) | 0.00 ± 0.00 | 0.00 ± 0.00 | -     | 0.00 ± 0.00 | 0.00 ± 0.00 | -     | -     |

Values are presented as mean ± SD

<sup>1)</sup> Analyzed by Wilcoxon's signed rank test (within group comparison).

<sup>2)</sup> Changes from baseline between the PPCE and placebo groups at week 8 were determined using the Mann-Whitney's U test.

## Supplementary Table 2 Laboratory profiles of the subjects in this study

| Laboratory profiles<br>(standard range)                                           | Test group (n=30) |                |              |                               | Placebo (n=30) |                |               |                               | <i>p</i> -value <sup>1)</sup> |
|-----------------------------------------------------------------------------------|-------------------|----------------|--------------|-------------------------------|----------------|----------------|---------------|-------------------------------|-------------------------------|
|                                                                                   | Baseline          | 8-week         | Change value | <i>p</i> -value <sup>1)</sup> | Baseline       | 8-week         | Change value  | <i>p</i> -value <sup>1)</sup> |                               |
| <b>WBC</b> (4.8~10.8×10 <sup>3</sup> /μL)                                         | 5.07 ± 0.91       | 4.93 ± 0.92    | -0.14 ± 0.63 | 0.233                         | 5.08 ± 0.87    | 5.02 ± 1.12    | -0.06 ± 0.72  | 0.667                         | 0.695 <sup>3)</sup>           |
| <b>RBC</b><br>(M: 4.7~6.1×10 <sup>3</sup> /μL,<br>F: 0.2~5.4×10 <sup>3</sup> /μL) | 4.40 ± 0.29       | 4.41 ± 0.24    | 0.01 ± 0.18  | 0.837                         | 4.40 ± 0.26    | 4.44 ± 0.25    | 0.03 ± 0.15   | 0.207                         | 0.522                         |
| <b>Hemoglobin</b><br>(M: 13~18 g/dL,<br>F: 12~16 g/dL)                            | 13.58 ± 1.05      | 13.54 ± 0.87   | -0.04 ± 0.53 | 0.960 <sup>2)</sup>           | 13.56 ± 0.91   | 13.58 ± 0.94   | 0.03 ± 0.50   | 0.872 <sup>2)</sup>           | 0.627                         |
| <b>Hematocrit</b><br>(M: 42~52,<br>F: 37~47%)                                     | 40.68 ± 2.89      | 40.51 ± 2.43   | -0.18 ± 1.57 | 0.544                         | 40.50 ± 2.55   | 40.72 ± 2.53   | 0.22 ± 1.27   | 0.352                         | 0.318                         |
| <b>MCV</b><br>(M: 80~94,<br>F: 81~99/fL)                                          | 92.46 ± 3.47      | 91.91 ± 3.28   | -0.55 ± 1.32 | 0.031 <sup>2)</sup>           | 92.03 ± 3.57   | 91.80 ± 3.37   | -0.23 ± 1.45  | 0.391                         | 0.365                         |
| <b>MCH</b> (27~32/pg)                                                             | 30.85 ± 1.44      | 30.71 ± 1.26   | -0.14 ± 0.41 | 0.062 <sup>2)</sup>           | 30.79 ± 1.34   | 30.61 ± 1.27   | -0.18 ± 0.51  | 0.061                         | 0.689                         |
| <b>MCHC</b> (33~37/g/dL)                                                          | 33.38 ± 0.62      | 33.42 ± 0.62   | 0.04 ± 0.49  | 0.657                         | 33.47 ± 0.78   | 33.35 ± 0.64   | -0.12 ± 0.60  | 0.281                         | 0.300                         |
| <b>Platelet</b><br>(130~450×10 <sup>3</sup> /μL)                                  | 252.47 ± 44.40    | 259.73 ± 51.65 | 7.27 ± 23.87 | 0.174 <sup>2)</sup>           | 254.27 ± 51.33 | 254.60 ± 44.48 | 0.33 ± 23.34  | 0.938                         | 0.173                         |
| <b>Neutrophil</b><br>(1.8~7.8×10 <sup>3</sup> /μL)                                | 50.97 ± 6.25      | 50.77 ± 8.34   | -0.20 ± 5.94 | 0.849 <sup>2)</sup>           | 51.52 ± 6.70   | 52.63 ± 7.16   | 1.12 ± 6.45   | 0.351                         | 0.448                         |
| <b>Lymphocyte</b> (20~44%)                                                        | 39.61 ± 6.05      | 38.99 ± 7.83   | -0.62 ± 5.14 | 0.514                         | 38.67 ± 6.58   | 37.92 ± 6.95   | -0.75 ± 5.82  | 0.486                         | 0.932                         |
| <b>Monocyte</b> (2~9%)                                                            | 6.47 ± 1.60       | 6.72 ± 1.84    | 0.25 ± 2.01  | 0.894 <sup>2)</sup>           | 6.61 ± 1.53    | 6.51 ± 1.27    | -0.11 ± 1.50  | 0.752 <sup>2)</sup>           | 0.631 <sup>3)</sup>           |
| <b>Eosinophil</b> (~5%)                                                           | 2.48 ± 1.50       | 3.02 ± 2.01    | 0.53 ± 1.29  | 0.025 <sup>2)</sup>           | 2.73 ± 1.79    | 2.47 ± 1.50    | -0.26 ± 1.29  | 0.282 <sup>2)</sup>           | 0.009 <sup>3)</sup>           |
| <b>Basophil</b> (~2%)                                                             | 0.46 ± 0.31       | 0.50 ± 0.32    | 0.04 ± 0.22  | 0.309 <sup>2)</sup>           | 0.47 ± 0.42    | 0.47 ± 0.37    | 0.00 ± 0.23   | 0.933 <sup>2)</sup>           | 0.976 <sup>3)</sup>           |
| <b>ALP</b> (45~129 IU/L)                                                          | 80.17 ± 21.64     | 78.13 ± 22.95  | -2.03 ± 8.07 | 0.180 <sup>2)</sup>           | 80.73 ± 24.25  | 77.60 ± 19.42  | -3.13 ± 10.60 | 0.161 <sup>2)</sup>           | 0.853 <sup>3)</sup>           |
| <b>GGT</b><br>(M: 12~73,<br>F: 8~48 IU/L)                                         | 23.23 ± 15.82     | 21.63 ± 11.07  | -1.60 ± 7.63 | 0.710 <sup>2)</sup>           | 23.03 ± 15.21  | 22.00 ± 11.22  | -1.03 ± 10.47 | 0.395 <sup>2)</sup>           | 0.384 <sup>3)</sup>           |
| <b>AST</b> (12~33 IU/L)                                                           | 22.87 ± 7.20      | 23.40 ± 9.91   | 0.53 ± 4.68  | 0.733 <sup>2)</sup>           | 23.57 ± 7.01   | 22.70 ± 4.48   | -0.87 ± 5.84  | 0.694 <sup>2)</sup>           | 0.619 <sup>3)</sup>           |

|                                             |                |                |               |                      |                |                |               |                     |                     |
|---------------------------------------------|----------------|----------------|---------------|----------------------|----------------|----------------|---------------|---------------------|---------------------|
| <b>ALT</b> (5~35 IU/L)                      | 22.43 ± 10.44  | 23.87 ± 12.57  | 1.43 ± 7.11   | 0.187 <sup>2)</sup>  | 24.13 ± 11.04  | 22.97 ± 8.58   | -1.17 ± 7.07  | 0.929 <sup>2)</sup> | 0.224 <sup>3)</sup> |
| <b>Total bilirubin</b><br>(0.2~1.2 mg/dL)   | 0.85 ± 0.22    | 0.84 ± 0.28    | -0.01 ± 0.20  | 0.944 <sup>2)</sup>  | 0.84 ± 0.28    | 0.88 ± 0.21    | 0.04 ± 0.20   | 0.220 <sup>2)</sup> | 0.341               |
| <b>Total protein</b><br>(6.7~8.3 g/dL)      | 7.41 ± 0.33    | 7.37 ± 0.26    | -0.04 ± 0.27  | 0.424                | 7.38 ± 0.33    | 7.36 ± 0.26    | -0.02 ± 0.23  | 0.585               | 0.790               |
| <b>Albumin</b><br>(3.5~5.3 g/dL)            | 4.32 ± 0.17    | 4.25 ± 0.15    | -0.07 ± 0.16  | 0.063 <sup>2)</sup>  | 4.28 ± 0.16    | 4.26 ± 0.12    | -0.02 ± 0.11  | 0.220 <sup>2)</sup> | 0.484 <sup>3)</sup> |
| <b>BUN</b> (8~23 mg/dL)                     | 14.67 ± 3.59   | 15.97 ± 4.08   | 1.30 ± 3.02   | 0.025                | 15.13 ± 3.51   | 15.53 ± 3.61   | 0.40 ± 4.21   | 0.607               | 0.340               |
| <b>Creatinine</b><br>(0.7~1.7 mg/dL)        | 0.63 ± 0.14    | 0.63 ± 0.13    | 0.00 ± 0.07   | 0.942                | 0.61 ± 0.13    | 0.62 ± 0.13    | 0.01 ± 0.09   | 0.638               | 0.627               |
| <b>Total cholesterol</b><br>(~200 mg/dL)    | 211.73 ± 34.15 | 212.07 ± 33.13 | 0.33 ± 24.95  | 0.942                | 203.97 ± 32.49 | 214.90 ± 33.68 | 10.93 ± 29.38 | 0.051               | 0.506 <sup>3)</sup> |
| <b>Triglycerides</b><br>(~200 mg/dL)        | 137.03 ± 59.84 | 147.53 ± 66.83 | 10.50 ± 62.03 | 0.292 <sup>2)</sup>  | 132.60 ± 54.92 | 137.20 ± 60.93 | 4.60 ± 50.60  | 0.733 <sup>2)</sup> | 0.628               |
| <b>HDL cholesterol</b><br>(41.5~67.3 mg/dL) | 50.73 ± 10.04  | 50.93 ± 10.85  | 0.20 ± 4.50   | 0.809                | 49.77 ± 9.95   | 52.90 ± 11.41  | 3.13 ± 6.93   | 0.019               | 0.087 <sup>3)</sup> |
| <b>LDL cholesterol</b><br>(~140 mg/dL)      | 133.57 ± 28.48 | 131.67 ± 30.24 | -1.90 ± 20.78 | 0.620                | 127.67 ± 31.25 | 134.53 ± 31.11 | 6.87 ± 26.91  | 0.173               | 0.425 <sup>3)</sup> |
| <b>Glucose</b> (74~106 mg/dL)               | 85.30 ± 6.52   | 85.97 ± 6.57   | 0.67 ± 6.86   | 0.599                | 83.13 ± 6.86   | 86.20 ± 6.47   | 3.07 ± 6.00   | 0.009               | 0.207               |
| <b>Creatinine Kinase</b><br>(50~200 IU/L)   | 96.77 ± 47.21  | 111.37 ± 90.65 | 14.60 ± 55.95 | 0.293 <sup>2)</sup>  | 94.00 ± 41.30  | 87.40 ± 34.07  | -6.60 ± 32.43 | 0.274 <sup>2)</sup> | 0.117 <sup>3)</sup> |
| <b>LDH</b> (218~472 IU/L)                   | 394.07 ± 51.77 | 402.40 ± 56.45 | 8.33 ± 44.81  | 0.236 <sup>2)</sup>  | 387.73 ± 45.89 | 393.60 ± 59.77 | 5.87 ± 32.96  | 0.307 <sup>2)</sup> | 0.717 <sup>3)</sup> |
| <b>ESR</b> (~9 mm/hr)                       | 17.30 ± 10.57  | 10.40 ± 10.40  | -6.90 ± 9.88  | 0.0002 <sup>2)</sup> | 18.43 ± 16.91  | 10.00 ± 8.27   | -8.43 ± 14.23 | 0.004 <sup>2)</sup> | 0.604 <sup>3)</sup> |
| <b>SG</b> (1.005~1.030)                     | 1.02 ± 0.01    | 1.02 ± 0.00    | 0.00 ± 0.01   | 0.087 <sup>2)</sup>  | 1.02 ± 0.01    | 1.02 ± 0.01    | 0.00 ± 0.01   | 0.478               | 0.834               |
| <b>pH</b> (4.5~9.0)                         | 5.98 ± 0.89    | 6.23 ± 0.69    | 0.25 ± 0.85   | 0.093 <sup>2)</sup>  | 6.13 ± 0.71    | 6.05 ± 0.80    | -0.08 ± 0.73  | 0.523 <sup>2)</sup> | 0.096 <sup>3)</sup> |

Values are presented as mean ± SD

<sup>1)</sup> Analyzed by linear mixed effect model for repeated measure data.

<sup>2)</sup> Analyzed by Wilcoxon's signed rank test (within group comparison).

<sup>3)</sup> Changes from baseline between the PPCE and placebo groups at week 8 were determined using the Mann-Whitney's U test.

Abbreviations: M, Male, F, Female, WBC, White Blood Cell; RBC, Red Blood Cell; ALP, Alkaline Phosphatase; GGT, Gamma Glutamyl Transferase; AST, Aspartate Transaminase; ALT, Alanine Transaminase; BUN, Blood Urea Nitrogen; CK, creatine kinase; LDH, lactate dehydrogenase.
